# Supplementary material for: Antibiotic Use and Bacterial Infection in COVID-19 Patients in the Second Phase of the SARS-CoV-2 Pandemic: A Scoping Review
Source: Antibiotics (Basel). 2022 Jul 23;11(8):991. doi: 10.3390/antibiotics11080991 (PMC9331316; doi:10.3390/antibiotics11080991)
Supplement: Supplementary file 1 [file antibiotics-11-00991-s001.zip › antibiotics-1822400-supplementary.pdf]

**Supplementary Table S1.** Study type and health outcomes in COVID-19 patients

| Geographical region | Antibiotic prescribing percentage | LOS (Mean Days)    | Discharge (Mean%)   | Mortality (Mean%)   |
|---------------------|-----------------------------------|--------------------|---------------------|---------------------|
| Case control        | 34.4% (6 studies)                 | 10.5 (2 studies)   | 89.0% (4 studies)   | 16.2% (5 studies)   |
| Case report/series  | 62.0% (26 studies)                | 12.8 (10 studies)  | 68.3% (18 studies)  | 17.0% (21 studies)  |
| Cohort              | 35.5% (96 studies)                | 14.1 (47 studies)  | 75.8% (56 studies)  | 10.3% (95 studies)  |
| Cross sectional     | 56.4% (5 studies)                 | 11.8 (4 studies)   | 94.7% (5 studies)   | 6.5% (5 studies)    |
| Qualitative         | 21.4% (6 studies)                 | 10.0 (1 study)     | 80.5% (2 studies)   | 17.0% (4 studies)   |
| Survey              | 44.9% (7 studies)                 | 14.9 (3 studies)   | 100% (1 study)      | 0% (2 studies)      |
| Other observational | 56.0% (274 studies)               | 14.9 (120 studies) | 75.8% (182 studies) | 13.3% (254 studies) |
| RCT                 | 50.9% (17 studies)                | 6.5 (2 studies)    | 69.9% (7 studies)   | 19.5% (14 studies)  |

**Supplementary Table S2.** Information on class of antibiotics frequently prescribed for COVID-19 patients in the selected studies

| Class of antibiotic | Number of studies reported |
|---------------------|----------------------------|
| Macrolides          | 154                        |
| Cephalosporins      | 154                        |
| Fluroquinones       | 104                        |
| Beta lactams        | 74                         |
| Carbapenems         | 68                         |
| Glycopeptides       | 43                         |
| Penicillins         | 42                         |
| Tetracyclines       | 23                         |
